# Supplementary material for: Evaluation of Domestication Loci Associated with Awnlessness in Cultivated Rice, Oryza sativa
Source: PubMed Central journal article supplement (PMC7188743; doi:10.1186/s12284-020-00386-4), 2020-04-28
Supplement: 12284_2020_386_MOESM2_ESM.pdf [file 12284_2020_386_MOESM2_ESM.pdf]

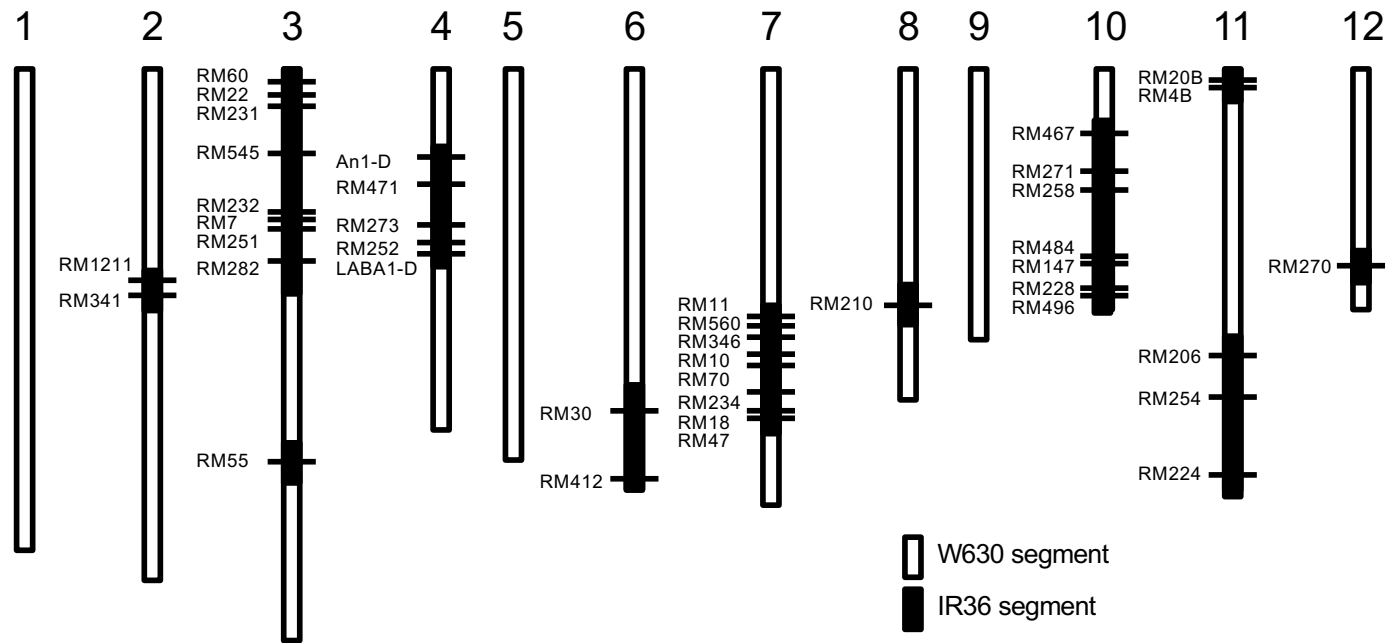

**Figure S1** Graphical genotype of the J5 backcross recombinant inbred line.

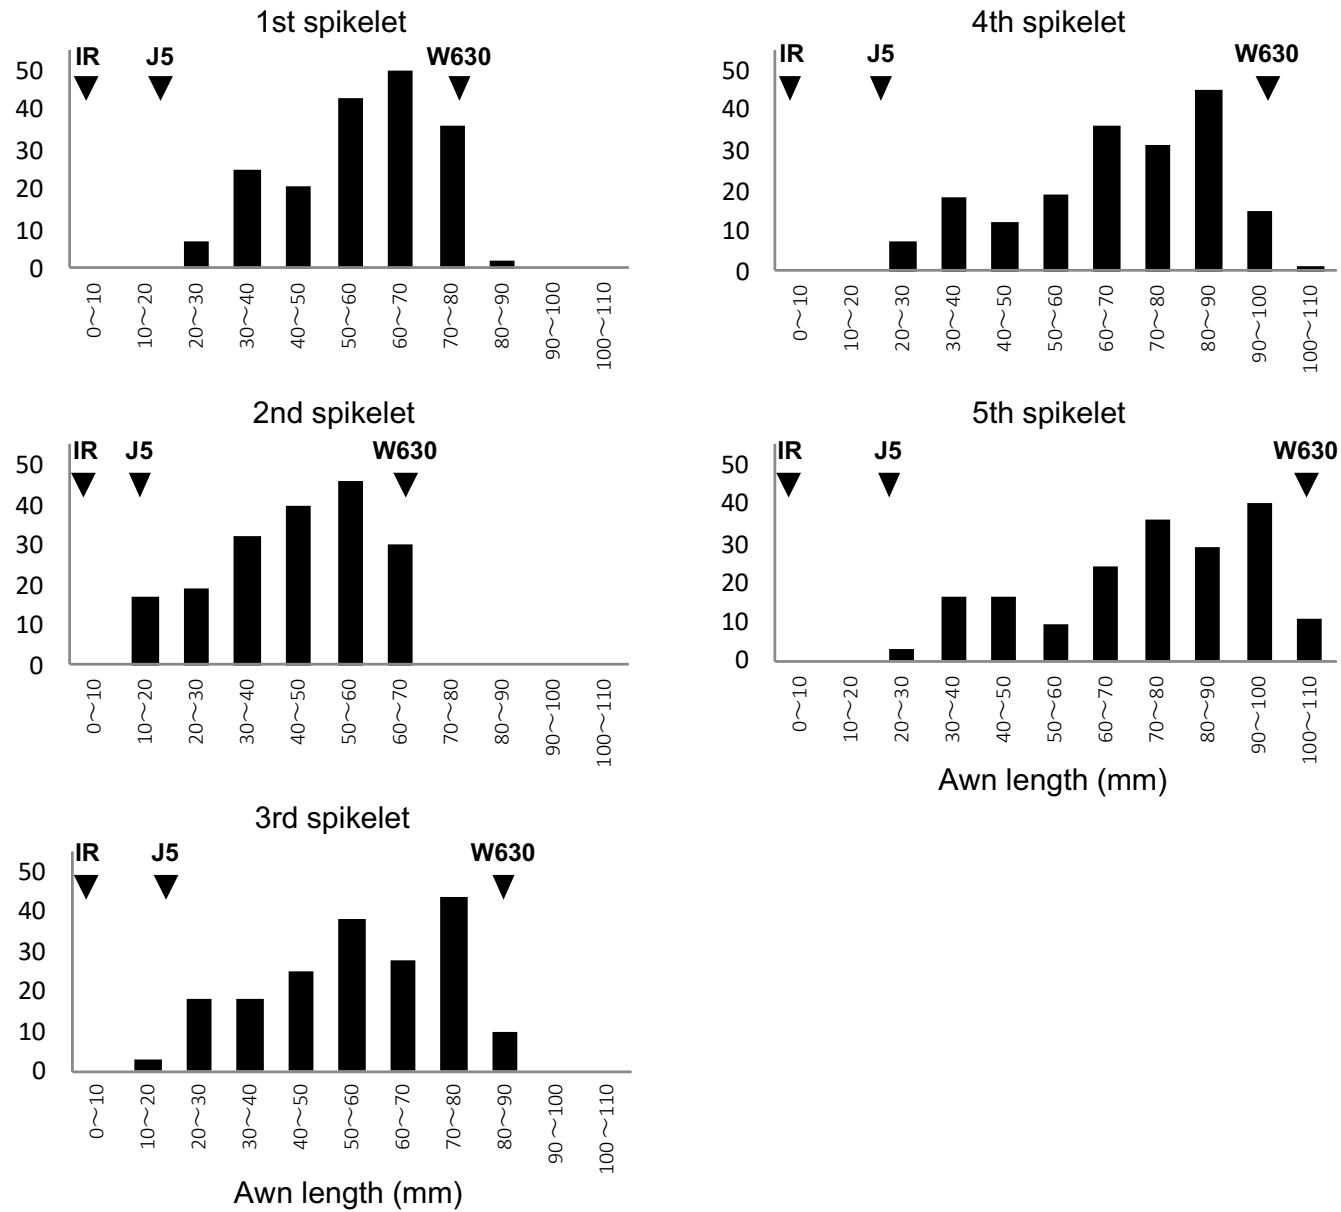

**Figure S2** Frequency distributions of awn lengths in the 1st to 5th spikelet positions in BC<sub>3</sub>F<sub>2</sub> population between *O. rufipogon* W630 and the J5 line. The triangles show the average values of the parental lines.

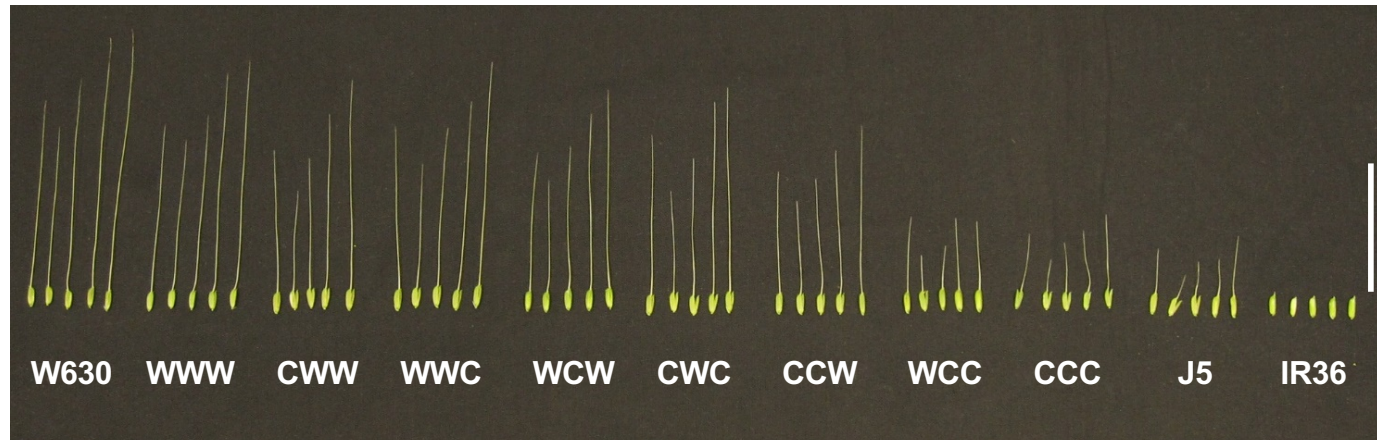

**Figure S3** Spikelet morphology of the eight genotypes of  $BC_3F_3$  plants together with *O. rufipogon* W630, J5 line and *O. sativa* IR36. The eight genotypes were designated by three-letter combinations of W or C in genotypic order at *qAWN2*, *An-1* and *LABA1*, where W and C indicate wild and cultivated homozygous alleles, respectively. For each genotype, the 1st to 5th spikelets are arranged from left to right. Scale bar: 5 cm.

### 1st spikelet

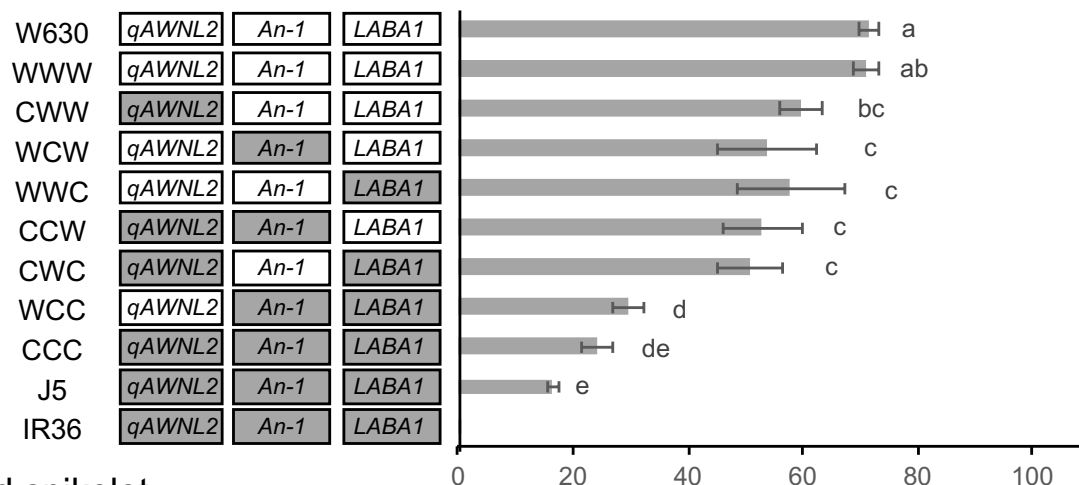

### 2nd spikelet

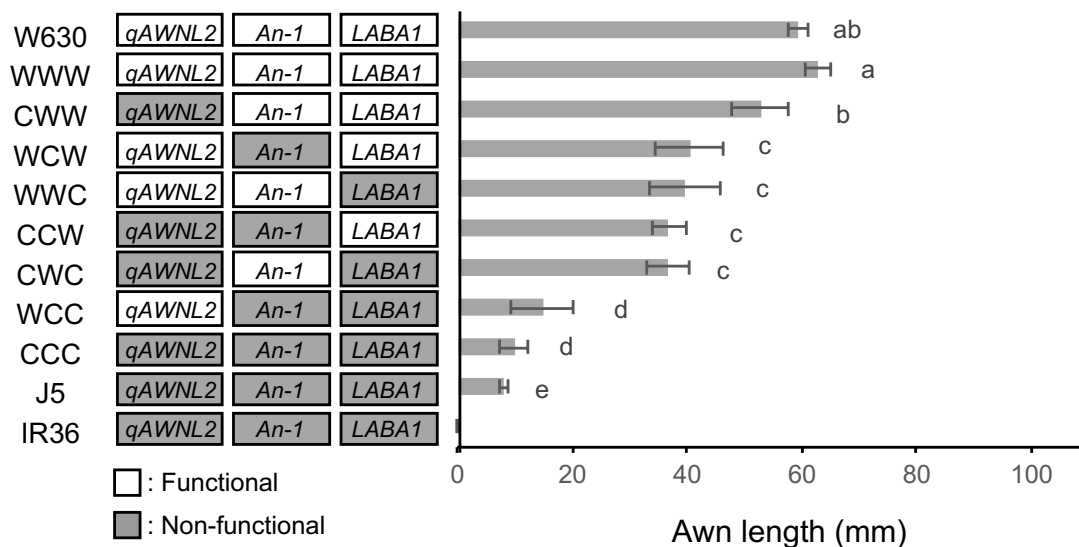

**Figure S4** Awn lengths (means  $\pm$  SD) of the 1st to 4th spikelets of eight homozygous genotypes in the wild genetic background. They are compared together with the parental accessions of *O. rufipogon* W630 and the J5 line. Average awn lengths of *O. sativa* IR36 are shown for reference. Eight genotypes were designated by three-letter combinations of W or C in genotypic order at *qAWN2*, *An-1* and *LABA1*, where W and C indicate wild and cultivated homozygous alleles, respectively. White and gray boxes with the locus names beside the genotypes indicate functional (wild) and non-functional (cultivated) homozygous alleles, respectively. Means labeled with different letters are significantly different among the eight genotypes and two parental lines (Tukey's test,  $P < 0.05$ ).

### 3rd spikelet

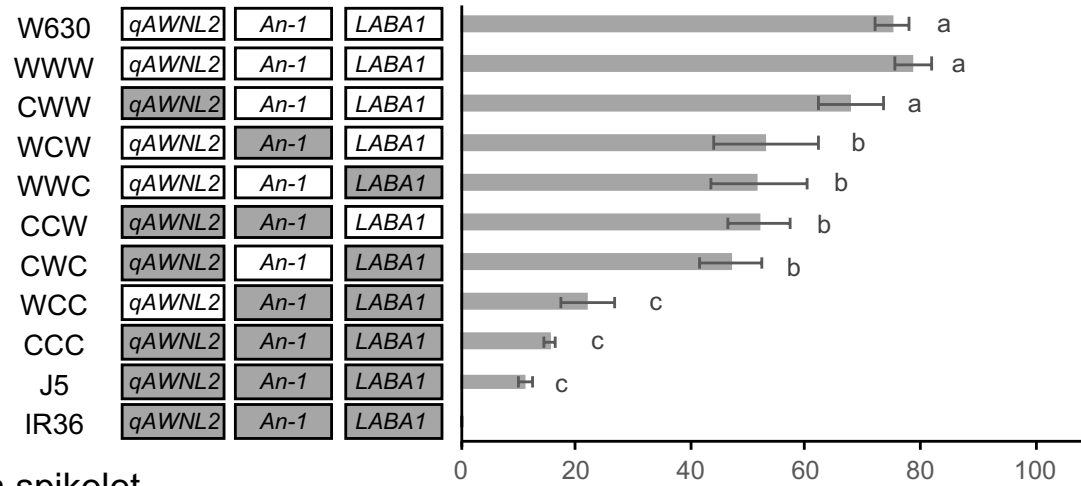

### 4th spikelet

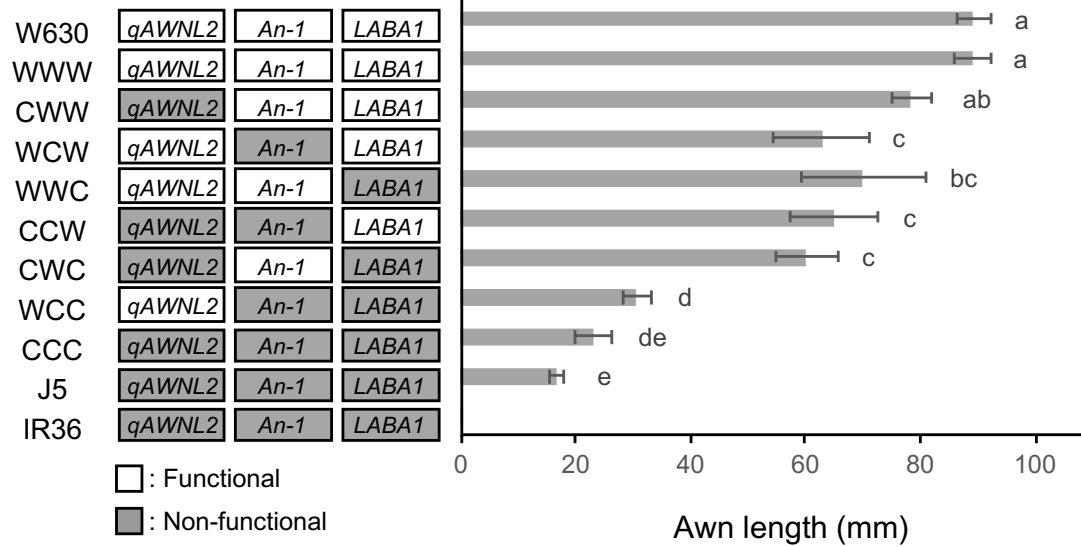

□ : Functional  
 ■ : Non-functional

Figure S4 (continued)
